# Supplementary figures and images for: Serum multi-omics analysis in hindlimb unloading mice model: Insights into systemic molecular changes and potential diagnostic and therapeutic biomarkers
Source: PubMed Central journal article supplement — Heliyon. 2023 Dec 12;10(1):e23592. doi: 10.1016/j.heliyon.2023.e23592 (PMC10770503; doi:10.1016/j.heliyon.2023.e23592), 2023-12-12

# Supplementary Figure 1

A

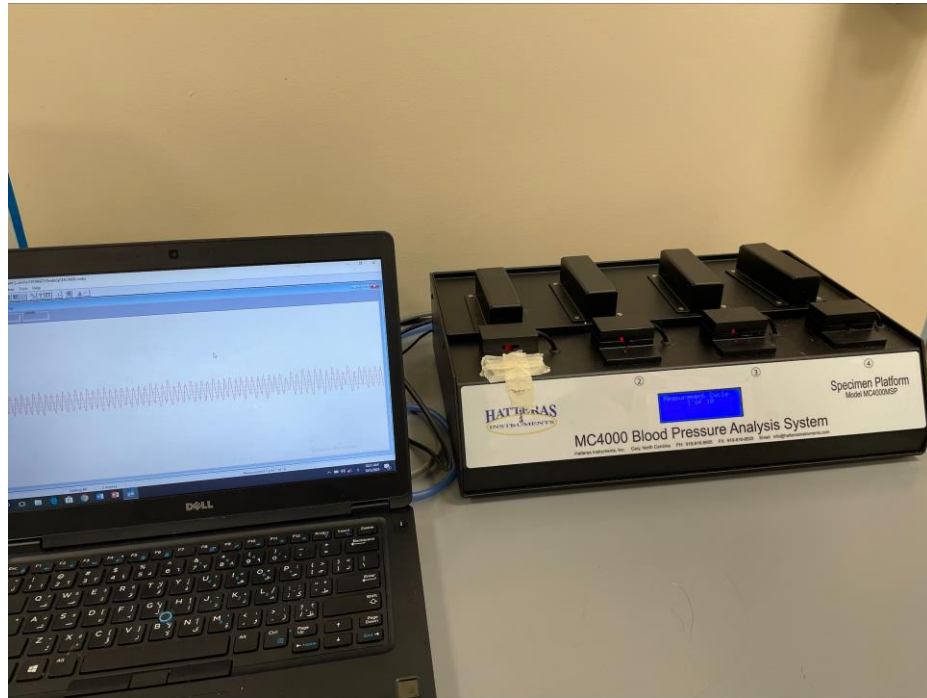

B

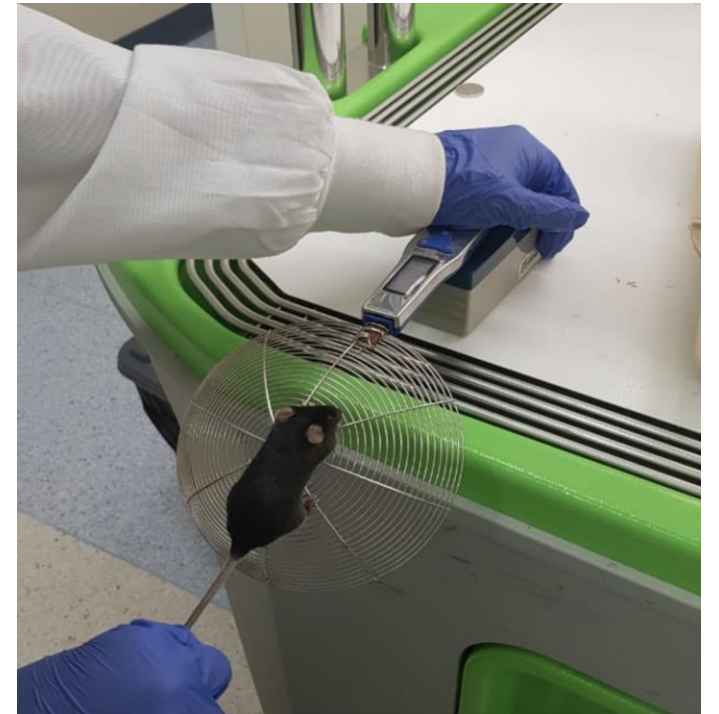

Supplement: mmc1.pdf [file mmc1.pdf]
